# Supplementary material for: The Effect of Ambient Environmental Conditions on COVID-19 Mortality: A Systematic Review
Source: MDPI journal article supplement (doi:10.3390/ijerph18126665), 2021-06-21
Supplement: s1 [file s1]

**Table S1.** Search String for Databases/Register

| MEDLINE (via Ovid) |                                                                                                                                    |
|--------------------|------------------------------------------------------------------------------------------------------------------------------------|
| 1.                 | (weather or season or temperature or relative humidity or altitude or latitude or environment).tw                                  |
| 2.                 | (coronavirus or covid* or SARS* or severe acute respiratory or severe acute respiratory syndrome or coronavi* or corona virus).tw. |
| 3.                 | 1 and 2                                                                                                                            |
| 4.                 | limit 3 to dd=20200101-20210104                                                                                                    |
| 5.                 | limit 3 to rd=20200101-20210104                                                                                                    |

**Pubmed:**

((“weather”[tw] OR “season”[tw] OR “temperature”[tw] OR “relative humidity”[tw] OR “latitude” OR “altitude” OR “environment”) AND (“coronavirus”[tw] OR “covid”[tw] OR “SARS2”[tw] OR “SARS-CoV-2” [tw] OR “severe acute respiratory syndrome”[tw] OR “severe acute respiratory”[tw] OR “coronaviridae”[tw] OR “corona virus”[tw])) AND 2020/01/03:2021/01/04[dp]

**Cochrane COVID-19 study register:**

Keywords: season, temperature, humidity, altitude, latitude, environment

**Table S2.** Risk of Bias Tool

| Major risk of bias domains                                                                                                                                                                                                                                                                                                                                                                                                                                                                                                                                                                                                                                                                                                                                                                                | Risk    | Criteria                                                                                                                                                                                                                                                                                                                                                                                                                                                                                                                                                                                                                                                                                                                                                                      | Hints/ notes |
|-----------------------------------------------------------------------------------------------------------------------------------------------------------------------------------------------------------------------------------------------------------------------------------------------------------------------------------------------------------------------------------------------------------------------------------------------------------------------------------------------------------------------------------------------------------------------------------------------------------------------------------------------------------------------------------------------------------------------------------------------------------------------------------------------------------|---------|-------------------------------------------------------------------------------------------------------------------------------------------------------------------------------------------------------------------------------------------------------------------------------------------------------------------------------------------------------------------------------------------------------------------------------------------------------------------------------------------------------------------------------------------------------------------------------------------------------------------------------------------------------------------------------------------------------------------------------------------------------------------------------|--------------|
| <b>1. Recruitment procedure</b><br><i>For ecological studies or other analytical studies<sup>†</sup></i><br><br><i>HINT: We are looking for selection bias: Examples of baseline difference:</i> <ul style="list-style-type: none"> <li>• Protocols for recruitment or inclusion/exclusion criteria were applied differently across study groups</li> <li>• Study participants/populations were recruited at different times</li> <li>• Study participants/populations were recruited at different times</li> <li>• Study participants were recruited from different populations and proportions of participants from each population in each study group are not uniform (consider study base principle)</li> <li>• Participation rates were inadequate or not comparable across study groups</li> </ul> | low     | <input type="checkbox"/> There were no baseline differences among study groups or adjustment techniques were used to correct for the differences, OR there is insufficient information about participant selection, but there is indirect evidence that suggests that participant recruitment and inclusion/exclusion criteria was consistent, as described by the criteria for a judgment of low risk of bias-                                                                                                                                                                                                                                                                                                                                                               |              |
|                                                                                                                                                                                                                                                                                                                                                                                                                                                                                                                                                                                                                                                                                                                                                                                                           | high    | There were baseline differences among study groups and no adjustment was used to correct for differences, such as (select all that apply): <ul style="list-style-type: none"> <li><input type="checkbox"/> Protocols for recruitment or inclusion/exclusion criteria were applied differently across study groups.</li> <li><input type="checkbox"/> Study participants/populations were recruited at different times.</li> <li><input type="checkbox"/> Study participants were recruited from different populations and proportions of participants from each population in each study group are not uniform (study base principle not considered).</li> <li><input type="checkbox"/> Participation rates were inadequate or not comparable across study groups.</li> </ul> |              |
|                                                                                                                                                                                                                                                                                                                                                                                                                                                                                                                                                                                                                                                                                                                                                                                                           | unclear | <input type="checkbox"/> There is insufficient information about participant selection to permit a judgment.                                                                                                                                                                                                                                                                                                                                                                                                                                                                                                                                                                                                                                                                  |              |
| <b>2. Exposure assessment</b><br><br><i>Example of high risk of bias: average temperature/humidity readings are taken to represent a whole country.</i>                                                                                                                                                                                                                                                                                                                                                                                                                                                                                                                                                                                                                                                   | low     | <input type="checkbox"/> There is high confidence in the accuracy of the exposure assessment <sup>#</sup> or less established/ less direct exposure measurements are validated against well-established of direct methods <sup>†</sup> AND <input type="checkbox"/> Exposure measurements are geographically close to outcome measurements to represent exposure status of the cases.                                                                                                                                                                                                                                                                                                                                                                                         |              |
|                                                                                                                                                                                                                                                                                                                                                                                                                                                                                                                                                                                                                                                                                                                                                                                                           | high    | <input type="checkbox"/> Exposure was not accurately measured. <sup>#</sup><br><input type="checkbox"/> Less established or less direct exposure measurements are not validated and are suspected to introduce bias, which may affect the outcome assessment. <sup>†</sup>                                                                                                                                                                                                                                                                                                                                                                                                                                                                                                    |              |

| Major risk of bias domains                                                                                                                                                                                                                                                                                                                                                                                                                                                                                                                            | Risk    | Criteria                                                                                                                                                                                                                                                                                                                                                                                                                                                                                                                                                               | Hints/ notes              |
|-------------------------------------------------------------------------------------------------------------------------------------------------------------------------------------------------------------------------------------------------------------------------------------------------------------------------------------------------------------------------------------------------------------------------------------------------------------------------------------------------------------------------------------------------------|---------|------------------------------------------------------------------------------------------------------------------------------------------------------------------------------------------------------------------------------------------------------------------------------------------------------------------------------------------------------------------------------------------------------------------------------------------------------------------------------------------------------------------------------------------------------------------------|---------------------------|
|                                                                                                                                                                                                                                                                                                                                                                                                                                                                                                                                                       |         | <input type="checkbox"/> Exposure measurements are not geographically close to outcome measurements and therefore do not represent exposure status of the cases.                                                                                                                                                                                                                                                                                                                                                                                                       |                           |
|                                                                                                                                                                                                                                                                                                                                                                                                                                                                                                                                                       | unclear | <input type="checkbox"/> Not reported.                                                                                                                                                                                                                                                                                                                                                                                                                                                                                                                                 |                           |
| <b>3. Outcome “deaths/mortality”<br/>Source and validation</b><br><br><i>For COVID-19 deaths, WHO, John Hopkins Dashboard, and government agencies would be considered appropriate sources. There will be populations which may underreport COVID-19 deaths, but it is not possible to quantify or judge the extent of the underreporting. If underreporting is a concern, it should be mentioned in the discussion.</i><br><br><i>Excess mortality in the populations (i.e., compared to the previous year, will also be accepted as an outcome)</i> | low     | <input type="checkbox"/> Outcome was objectively ascertained to minimize bias through objective sources (see note). <sup>#</sup><br><input type="checkbox"/> Measurement methods were similar in the different groups. <sup>#</sup>                                                                                                                                                                                                                                                                                                                                    |                           |
|                                                                                                                                                                                                                                                                                                                                                                                                                                                                                                                                                       | high    | <input type="checkbox"/> Outcome was not objectively ascertained. <sup>#</sup><br><input type="checkbox"/> Measurement methods were different in the groups. <sup>#</sup>                                                                                                                                                                                                                                                                                                                                                                                              |                           |
|                                                                                                                                                                                                                                                                                                                                                                                                                                                                                                                                                       | unclear | <input type="checkbox"/> Not reported.                                                                                                                                                                                                                                                                                                                                                                                                                                                                                                                                 |                           |
| <b>4. Confounding</b>                                                                                                                                                                                                                                                                                                                                                                                                                                                                                                                                 | low     | <input type="checkbox"/> Major confounding factors were assessed and accounted for.<br>If more than one population within a country was studied: at least population density<br>If more than one country was studied: at least same as above and a measure of the healthcare system was accounted for (i.e., gross domestic product as proxy for differing health system would be acceptable).<br>In addition to above, if time span of study is long (i.e., greater than 1 month): government interventions, such as lockdowns or school closures were accounted for. | Confounders not assessed: |
|                                                                                                                                                                                                                                                                                                                                                                                                                                                                                                                                                       | high    | <input type="checkbox"/> Major confounding factors were not assessed nor were they accounted for.                                                                                                                                                                                                                                                                                                                                                                                                                                                                      |                           |

| Major risk of bias domains                                                                                                                                                                                                                                                                                             | Risk    | Criteria                                                                                                                                                                                                                                                                                                                                                                                                                                                      | Hints/ notes |
|------------------------------------------------------------------------------------------------------------------------------------------------------------------------------------------------------------------------------------------------------------------------------------------------------------------------|---------|---------------------------------------------------------------------------------------------------------------------------------------------------------------------------------------------------------------------------------------------------------------------------------------------------------------------------------------------------------------------------------------------------------------------------------------------------------------|--------------|
|                                                                                                                                                                                                                                                                                                                        | unclear | <input type="checkbox"/> Not reported.                                                                                                                                                                                                                                                                                                                                                                                                                        |              |
| <b>5. Analysis method: methods to reduce research specific bias</b><br><br><i>Example of similar variables reiterated in different forms: both maximum and minimum temperatures were used in the same model.</i><br><br><i>It is acceptable when one same variable is used non-linearly (i.e., in quadratic form).</i> | low     | Authors used adequate statistical models to reduce bias:<br><input type="checkbox"/> Considered autocorrelation AND<br><input type="checkbox"/> Similar variables in different forms were not reiterated in the model (see note) AND<br><input type="checkbox"/> If more than one population was studied, a component was included to allow for other differences in the populations studied (i.e., random effects)                                           |              |
|                                                                                                                                                                                                                                                                                                                        | high    | Authors did not use adequate statistical models to reduce bias:<br><input type="checkbox"/> Did not consider autocorrelation<br><input type="checkbox"/> Similar variables in different forms were reiterated in the model (i.e., both maximum and minimum temperatures used)<br><input type="checkbox"/> If more than one population was studied, there was no component included to allow for differences in the populations studied (i.e., random effects) |              |
|                                                                                                                                                                                                                                                                                                                        | unclear | <input type="checkbox"/> Not reported.                                                                                                                                                                                                                                                                                                                                                                                                                        |              |
| <b>6. Chronology</b>                                                                                                                                                                                                                                                                                                   | low     | <input type="checkbox"/> Temporal relation may be established (exposure precedes the outcome), for example by accounting for a sufficient lag effect between exposure and outcome (i.e., at least 22 days). <sup>#</sup>                                                                                                                                                                                                                                      |              |
|                                                                                                                                                                                                                                                                                                                        | high    | <input type="checkbox"/> Temporal relation cannot be established (i.e., no lag effect was included or was insufficient).                                                                                                                                                                                                                                                                                                                                      |              |
|                                                                                                                                                                                                                                                                                                                        | unclear | <input type="checkbox"/> Not reported.                                                                                                                                                                                                                                                                                                                                                                                                                        |              |
| Minor risk of bias domains*                                                                                                                                                                                                                                                                                            | Risk    | Criteria                                                                                                                                                                                                                                                                                                                                                                                                                                                      | Hints/ notes |
| <b>7. Funding</b>                                                                                                                                                                                                                                                                                                      | low     | <input type="checkbox"/> Grant/ non-profit-organizations*<br><input type="checkbox"/> Study was clearly not affected by sponsors. *                                                                                                                                                                                                                                                                                                                           |              |
|                                                                                                                                                                                                                                                                                                                        | high    | <input type="checkbox"/> Sponsoring organization participated in data analysis.<br><input type="checkbox"/> Study was probably affected by sponsors.                                                                                                                                                                                                                                                                                                          |              |
|                                                                                                                                                                                                                                                                                                                        | unclear | <input type="checkbox"/> Industry, combined industry+grant*, unclear if study was affected by sponsors.<br><input type="checkbox"/> Not reported.                                                                                                                                                                                                                                                                                                             |              |

| Minor risk of bias domains* | Risk    | Criteria                                                                                                                                                    | Hints/ notes |
|-----------------------------|---------|-------------------------------------------------------------------------------------------------------------------------------------------------------------|--------------|
| 8. Conflict of interest     | low     | <input type="checkbox"/> Reported not having conflict of interest or clear from report/communication that study was not affected by author(s) affiliation.* |              |
|                             | high    | <input type="checkbox"/> Conflict of interest exists (at least one author).*                                                                                |              |
|                             | unclear | <input type="checkbox"/> Not reported.                                                                                                                      |              |

\*according to Ijaz et al. (2013), with modifications; # SIGN/CASP

| Overall risk of bias assessment:<br>General rule for rating domains: if at least one box in domain is marked for “high risk”, the domain is high risk. |                                                              | Low Risk            | High Risk | Unclear Risk |
|--------------------------------------------------------------------------------------------------------------------------------------------------------|--------------------------------------------------------------|---------------------|-----------|--------------|
| Major domains                                                                                                                                          | 1. Recruitment procedure                                     |                     |           |              |
|                                                                                                                                                        | 2. Exposure assessment                                       |                     |           |              |
|                                                                                                                                                        | 3. Outcome source and validation                             |                     |           |              |
|                                                                                                                                                        | 4. Confounding                                               |                     |           |              |
|                                                                                                                                                        | 5. Analysis method: methods to reduce research specific bias |                     |           |              |
|                                                                                                                                                        | 6. Chronology                                                |                     |           |              |
| Minor domains                                                                                                                                          | 7. Funding                                                   |                     |           |              |
|                                                                                                                                                        | 8. Conflict of interest                                      |                     |           |              |
| General rule for overall rating: Low risk of bias: low risk in all major domains<br>High risk of bias: if not low risk                                 |                                                              | Overall assessment: |           |              |

Table S3. Characteristics of included studies

| Author, Year<br>Reference<br>number | Study<br>Design  | Study area/<br>Population size:<br><br>Number of cases:                                                | Time period<br>of study                 | Exposures<br>Exposure data source:<br>Exposure characteristics:                                                                                                                                                                                                                                                                                                                                                                                                                                                                                                                                                                                                    | Outcome definition:<br>Outcome source of data:                                                             |
|-------------------------------------|------------------|--------------------------------------------------------------------------------------------------------|-----------------------------------------|--------------------------------------------------------------------------------------------------------------------------------------------------------------------------------------------------------------------------------------------------------------------------------------------------------------------------------------------------------------------------------------------------------------------------------------------------------------------------------------------------------------------------------------------------------------------------------------------------------------------------------------------------------------------|------------------------------------------------------------------------------------------------------------|
| Ma, 2020                            | Ecological study | Wuhan, China<br><br>2299 COVID-19 deaths in<br>Wuhan (56 deaths/day)                                   | January 20-<br>February 29,<br>2020     | Daily average temperature, diurnal temperature<br>range (DTR), and relative humidity<br><br>Obtained from Shanghai Meteorological Bureau<br>and Data Center of Ministry of Ecology and<br>Environment of the People's Republic of China<br><br>Temperature:<br>Range: 1.8 °C- 18.7 °C<br>Mean ± SD: 7.44 ± 3.96 °C Median: 6.5 °C<br><br>DTR:<br>Range: 2 °C – 17.5 °C<br>Mean ± SD: 9.15 ± 4.74 °C<br>Median: 8.70 °C<br><br>Relative humidity:<br>Range: 59.00-97.00%<br>Mean ± SD: 82.25 ± 8.51%<br>Median: 83.00%<br><br>Absolute humidity:<br>Range: 4.27- 11.63 g/m <sup>3</sup><br>Mean ± SD: 6.69 ± 1.78 g/m <sup>3</sup><br>Median: 6.30 g/m <sup>3</sup> | COVID-19 deaths<br><br>Collected from the official<br>website of Health<br>Commission of Hubei<br>Province |
| Sobral, 2020                        | Ecological study | World<br>(249 countries)<br><br>Population size not specified<br><br>Number of deaths not<br>specified | December 1,<br>2019 - March<br>30, 2020 | Weather station data were extracted from the<br>National Oceanic and Atmospheric<br>Administration<br>(NOAA) database. Daily averages were<br>calculated for the different countries.<br><br>Average temperature (Fahrenheit)<br>Maximum temperature (Fahrenheit)                                                                                                                                                                                                                                                                                                                                                                                                  | Daily death rates<br><br>Extracted from World<br>Health Organization<br>reports                            |

| Author, Year<br>Reference<br>number | Study<br>Design  | Study area/<br>Population size:<br><br>Number of cases:                                                                                                                                                                 | Time period<br>of study         | Exposures<br>Exposure data source:<br>Exposure characteristics:                                                                                                                                                                                                                                                                | Outcome definition:<br>Outcome source of data:                                                                                       |
|-------------------------------------|------------------|-------------------------------------------------------------------------------------------------------------------------------------------------------------------------------------------------------------------------|---------------------------------|--------------------------------------------------------------------------------------------------------------------------------------------------------------------------------------------------------------------------------------------------------------------------------------------------------------------------------|--------------------------------------------------------------------------------------------------------------------------------------|
|                                     |                  |                                                                                                                                                                                                                         |                                 | Minimum temperature (Fahrenheit)                                                                                                                                                                                                                                                                                               |                                                                                                                                      |
|                                     |                  |                                                                                                                                                                                                                         |                                 | No descriptive data included                                                                                                                                                                                                                                                                                                   |                                                                                                                                      |
|                                     |                  |                                                                                                                                                                                                                         |                                 | Precipitation<br>Average rainfall per country (inches)                                                                                                                                                                                                                                                                         |                                                                                                                                      |
| Su, 2020                            | Ecological study | 178 countries/ regions<br>(excluding countries/region<br>without COVID-19 cases and<br>some unmatched<br>countries/region (i.e.<br>Taiwan)<br><br>Statistics of population and<br>cases are based on 6th April<br>2020. | January 22 -<br>April 6, 2020   | Global Surface Summary of the 183 Day (GSOD)<br>via The Integrated Surface Hourly (ISH) dataset<br>(includes global data obtained from the USAF<br>Climatology Center.<br><br>Mean temperature (°Celsius)<br>Relative humidity (%)<br>Precipitation (0.01 inches)                                                              | Cumulative Mortality<br>Rate (CMR)<br><br>John Hopkins University<br>dashboard from Center<br>for Systems Science and<br>Engineering |
| Wu, 2020                            | Ecological study | Worldwide (166 countries<br>excluding China)<br><br>Population size not given<br><br>23,335 deaths                                                                                                                      | December -<br>March 27,<br>2020 | Temperature, relative humidity<br><br>The monitoring stations nearest to each<br>country's capital were used.<br>Meteorological data were obtained from the<br>National Oceanic and Atmospheric<br>Administration Center.<br><br>Temperature<br>Range: -5.28 °C to 34.30 °C<br><br>Relative humidity<br>Range: 1.39% to 88.42% | Daily new deaths<br><br>Collected from WHO<br>daily situation reports                                                                |
| Rehman, 2020                        | Ecological study | Provinces of Pakistan<br><br>No information on<br>population size given                                                                                                                                                 | March 10-<br>July 10, 2020      | Daily mean humidity and wind, daily and<br>minimum temperature                                                                                                                                                                                                                                                                 | COVID-19 deaths<br><br>Collected from the<br>government of Pakistan                                                                  |

| Author, Year<br>Reference<br>number | Study<br>Design | Study area/<br>Population size:<br><br>Number of cases:                                                                                                                                      | Time period<br>of study | Exposures<br>Exposure data source:<br>Exposure characteristics:                                                                                                                                                                                                                                                                                                                                                                                                                                                                                                                                                                                                                                                                                                                                                                                                                                                                                                                                                                      | Outcome definition:<br>Outcome source of data:                                                                                                                                                                                                                     |
|-------------------------------------|-----------------|----------------------------------------------------------------------------------------------------------------------------------------------------------------------------------------------|-------------------------|--------------------------------------------------------------------------------------------------------------------------------------------------------------------------------------------------------------------------------------------------------------------------------------------------------------------------------------------------------------------------------------------------------------------------------------------------------------------------------------------------------------------------------------------------------------------------------------------------------------------------------------------------------------------------------------------------------------------------------------------------------------------------------------------------------------------------------------------------------------------------------------------------------------------------------------------------------------------------------------------------------------------------------------|--------------------------------------------------------------------------------------------------------------------------------------------------------------------------------------------------------------------------------------------------------------------|
|                                     |                 | As of July 10, 2020: 5,123<br>cumulative deaths<br>By area:<br>Sindh: 1,713<br>Punjab: 1,985<br>KPK: 1,074<br>Balochistan: 126<br>Islamabad: 147<br>Gilgit Baltistan: 36<br>Azad Kashmir: 42 |                         | Weather data from Pakistan Meteorological<br>Department ( <a href="http://www.pmd.gov.pk/en/">http://www.pmd.gov.pk/en/</a> ),<br><a href="https://www.timeanddate.com/weather/pakistan">https://www.timeanddate.com/weather/pakistan</a><br>, <a href="https://www.accuweather.com">https://www.accuweather.com</a> , although did<br>not specify which was used.<br><br>Mean humidity<br>Sindh: 61.91%<br>Punjab: 43.41%<br>Khyber Pakhtunkhwa (KPK): 52.24%<br>Balochistan: 32.08%<br>Islamabad: 50.83%<br>Gilgit Baltistan: 58.19%<br>Azad Kashmir: 57.35%<br><br>Mean wind<br>Sindh: 16.39 Km/h<br>Punjab: 11.95 Km/h<br>KPK: 14.19 Km/h<br>Balochistan: 18.24 Km/h<br>Islamabad: 12.53 Km/h<br>Gilgit Baltistan: 2.60 Km/h<br>Azad Kashmir: 4.39 Km/h<br><br>Mean Max Temperature (SD)<br>Sindh: 35.23 °C<br>Punjab: 34.13 °C<br>KPK: 31.86 °C<br>Balochistan: 28.37 °C<br>Islamabad: 31.43 °C<br>Gilgit Baltistan: 25.60 °C<br>Azad Kashmir: 28.11 °C<br><br>Mean Min Temperature (SD)<br>Sindh: 26.32 °C<br>Punjab: 22.06 °C | <a href="http://covid.gov.pk/stats/pakistan">http://covid.gov.pk/stats/pakistan</a> and<br>Worldometer<br>Coronavirus cases<br><a href="https://www.worldometer.info/coronavirus/country/pakistan/">https://www.worldometer.info/coronavirus/country/pakistan/</a> |



| Author, Year<br>Reference<br>number | Study<br>Design  | Study area/<br>Population size:<br><br>Number of cases:                                                                                  | Time period<br>of study   | Exposures<br>Exposure data source:<br>Exposure characteristics:                                                                                                                                                                                                                                                                                                                                                                                                                                             | Outcome definition:<br>Outcome source of data:                                                                                                                                                                                                                                                                |
|-------------------------------------|------------------|------------------------------------------------------------------------------------------------------------------------------------------|---------------------------|-------------------------------------------------------------------------------------------------------------------------------------------------------------------------------------------------------------------------------------------------------------------------------------------------------------------------------------------------------------------------------------------------------------------------------------------------------------------------------------------------------------|---------------------------------------------------------------------------------------------------------------------------------------------------------------------------------------------------------------------------------------------------------------------------------------------------------------|
| Guo, 2020                           | Ecological study | 415 sites comprising 235 cities from 10 countries and 180 countries<br><br>Population size not specified<br><br>119,257 confirmed deaths | January 23-April 13, 2020 | KPK: 20.63 °C<br>Balochistan: 16.86 °C<br>Islamabad: 20.21 °C<br>Gilgit Baltistan: 13.50 °C<br>Azad Kashmir: 16.14 °C<br>Hourly meteorological data (temperature, relative humidity, wind speed) aggregated as daily average meteorological data.<br>If study site had more than one monitoring station, average values of the meteorological factors were weighted by population density.<br><br>Ground-based monitoring network of the World Meteorological Organization global telecommunications system | COVID-19 mortality<br><br>Data repository from Johns Hopkins University Center for Systems Science and Engineering (JHU VSSE)<br>The Wind Financial databases (WFD) for detailed information on COVID-19 at city/state level in Australia, Canada, USA, China, Germany, Italy, Japan, Korea, Norway and Spain |
| Islam, 2020                         | Ecological study | Bangladesh<br><br>Population size not given<br><br>168 deaths                                                                            | March 8-April 30, 2020    | Night relative humidity (NRH), rainfall, diurnal temperature (TDN), mean temperature (MT), mean relative humidity (MRH), absolute humidity (AH)<br><br>Bangladesh Meteorological Department (BMD) data from 43 weather stations across the country which were demarcated into eight divisional cities.<br><br>Diurnal temperature (°C)<br>Mean (SD): 11.3 (1.9)<br>Range: 7.1-16.0<br><br>Mean temperature (°C)                                                                                             | COVID-19 death cases<br><br>Data from Bangladeshi government site                                                                                                                                                                                                                                             |

| Author, Year<br>Reference<br>number | Study<br>Design      | Study area/<br>Population size:<br><br>Number of cases:                                                                                                  | Time period<br>of study   | Exposures<br>Exposure data source:<br>Exposure characteristics:                                                                                                                                                                                                                                                                   | Outcome definition:<br>Outcome source of data:                                                                                                               |
|-------------------------------------|----------------------|----------------------------------------------------------------------------------------------------------------------------------------------------------|---------------------------|-----------------------------------------------------------------------------------------------------------------------------------------------------------------------------------------------------------------------------------------------------------------------------------------------------------------------------------|--------------------------------------------------------------------------------------------------------------------------------------------------------------|
|                                     |                      |                                                                                                                                                          |                           | Mean (SD): 26.6 (1.3)<br>Range: 23.1-28.4<br><br>Mean relative humidity (%)<br>Mean (SD): 64.2 (9.1)<br>Range: 41.6-80.4<br><br>Absolute humidity (%)<br>Mean (SD): 16.5 (2.8)<br>Range: 10.9-21.4<br><br>Rainfall (mm)<br>Mean (SD): 3 (5)<br>Range: 0-20.6                                                                      |                                                                                                                                                              |
| Jiang and Xu,<br>2021               | Ecologica<br>l study | Wuhan, China<br><br>No information on<br>population size given<br><br>Daily COVID-19 deaths:<br>Mean: 36.2<br>Min: 0<br>Max: 216                         | Jan 25 - April<br>7, 2020 | Daily temperature, relative humidity and<br>diurnal temperature range<br><br>Extracted from the Weather<br>Channel (www.weather.com)<br><br>Daily temperature:<br>Mean: 7.4°C, min: 0°C, Max: 18 °C<br>Relative humidity:<br>Mean: 79.5%, min: 58%, max: 96%<br>Diurnal temperature range:<br>Mean: 7.9 °C, min: 1 °C, max: 16 °C | COVID-19 deaths<br><br>Maintained by the Health<br>Commission<br>of Hubei China                                                                              |
| Sun<br>2020                         | Ecologica<br>l study | 317 local authority districts<br>(LADs) in England<br><br>3-month COVID-19<br>mortality rate (deaths per<br>100,000 persons):<br>Mean: 79.4<br>SD: 36.89 | March - May<br>2020       | 3-month mean monthly relative humidity and<br>monthly air temperature<br><br>Data set from Met Office<br>HadUK-Grid, Gridded Climate Observations on<br>a 1km grid over the UK                                                                                                                                                    | Aggregated three-month<br>England-wide COVID-19<br>mortality rate<br><br>Spatial patterns of<br>COVID-19 mortality<br>compared to non-COVID-<br>19 mortality |

| Author, Year<br>Reference<br>number | Study<br>Design  | Study area/<br>Population size:<br><br>Number of cases:                                                                                                                                             | Time period<br>of study | Exposures<br>Exposure data source:<br>Exposure characteristics:                                                                                                                                                                                                                                                                                                                                                                                                                                                                                  | Outcome definition:<br>Outcome source of data:                                                                                                                                           |
|-------------------------------------|------------------|-----------------------------------------------------------------------------------------------------------------------------------------------------------------------------------------------------|-------------------------|--------------------------------------------------------------------------------------------------------------------------------------------------------------------------------------------------------------------------------------------------------------------------------------------------------------------------------------------------------------------------------------------------------------------------------------------------------------------------------------------------------------------------------------------------|------------------------------------------------------------------------------------------------------------------------------------------------------------------------------------------|
|                                     |                  |                                                                                                                                                                                                     |                         | <p>Professional monitoring stations installed in monitoring sites.<br/>Monthly relative humidity and monthly air temperature were aggregated from grids to LADs.</p> <p>Average climatic measures of three months (i.e., March, April and May) in 2019 used to represent the climatic measures (i.e., relative humidity and range of air temperature) used in this study.</p> <p>3-month mean relative humidity (%) (R_H):<br/>Mean: 76.28<br/>SD: 1.9</p> <p>3-month mean range of air temperature (°C) (R_AT):<br/>Mean: 8.97<br/>SD: 0.84</p> | Office for National Statistics                                                                                                                                                           |
| Tzampoglou and Dimitrios, 2020      | Ecological study | <p>Worldwide 101 countries, (countries with Human Development Index (HDI) &lt; 0.7 excluded from analysis)</p> <p>No information on population size given</p> <p>Number of deaths not specified</p> | March to May 3, 2020    | <p>Monthly average atmospheric temperature (°C), monthly average relative humidity (%), and cumulative precipitation (mm)</p> <p>Collected from the Copernicus Program database, estimated from climate reanalysis ERA-Interim and ERA5</p> <p>Spatial analysis tool of the ArcGIS software was employed to derive the spatial average of variables across the entire territory of each country. After spatial averaging, temporal average values were computed for the March 2020 to May 2020 period.</p>                                       | <p>Total deaths per million due to COVID-19</p> <p>Taken from European Commission (EC), OurWorldInData.org, and COVID-19 Government Response Tracker, Blavatnik School of Government</p> |

| Author, Year<br>Reference<br>number | Study<br>Design      | Study area/<br>Population size:<br><br>Number of cases:                                                               | Time period<br>of study              | Exposures<br>Exposure data source:<br>Exposure characteristics:                                                                                                                                                                                                                                                                                                                                                                                                             | Outcome definition:<br>Outcome source of data:                                                                                                             |
|-------------------------------------|----------------------|-----------------------------------------------------------------------------------------------------------------------|--------------------------------------|-----------------------------------------------------------------------------------------------------------------------------------------------------------------------------------------------------------------------------------------------------------------------------------------------------------------------------------------------------------------------------------------------------------------------------------------------------------------------------|------------------------------------------------------------------------------------------------------------------------------------------------------------|
| Fernández<br>2021                   | Ecologica<br>l study | Worldwide<br>218 countries<br><br>No information on<br>population size given<br><br>Number of deaths not<br>specified | January 21st<br>to May 18th,<br>2020 | Maximum daily temperature and precipitation<br><br>Downloaded from NASA's Goddard Earth<br>Sciences Data and Information Services Center<br>(GES DISC).<br><br>Daily precipitation data obtained from<br>Integrated Multi-satellite Retrievals for Global<br>Precipitation Measurement (IMERG)<br>Maximum, minimum, and average, daily<br>temperatures:<br>obtained from the MERRA-2 (a Modern-Era<br>Retrospective analysis for Research and<br>Applications<br>version 2) | Daily confirmed deaths<br>and the total amount of<br>confirmed deaths<br><br>Based on population-level<br>information<br>(per country), reported by<br>WHO |

**Table S4.** Results of included studies

| Author, Year<br>Country | Outcome definition:<br>Outcome measurement:                                                                                                                              | Confounders/ interaction terms in<br>model:                                                                                                                                                                                | Results<br>Analysis methods:<br>Lag:<br>Summary of results:                                                                                                                                                                                                                                                                                                                                                                                                                                                                                                |
|-------------------------|--------------------------------------------------------------------------------------------------------------------------------------------------------------------------|----------------------------------------------------------------------------------------------------------------------------------------------------------------------------------------------------------------------------|------------------------------------------------------------------------------------------------------------------------------------------------------------------------------------------------------------------------------------------------------------------------------------------------------------------------------------------------------------------------------------------------------------------------------------------------------------------------------------------------------------------------------------------------------------|
| Ma 2020<br>China        | COVID-19 deaths<br><br>Collected from the official website<br>of Health Commission of Hubei<br>Province: <a href="http://wjw.hubei.gov.cn/">http://wjw.hubei.gov.cn/</a> | air pollutants, date of the week, time<br>trends                                                                                                                                                                           | Generalized additive model (GAM) to analyze<br>associations, with a quasi-Poisson link function.<br>Used smoothed spline functions of times to<br>accommodate nonlinear and nonmonotonic<br>patterns between mortality and time.<br><br>Examined single day lag and multiple-day<br>average lag effects (0-5 lag) of weather conditions<br><br>% change of COVID-19 mortality (based on<br>figures 2 and 3 of the text)- no quantitative<br>figures could be obtained.                                                                                     |
| Sobral 2020<br>Italy    | Daily death rates<br><br>Extracted from World Health<br>Organization reports                                                                                             | Population density, dummy month<br>(specific month effects), country's time<br>of exposure to the epidemic (temporal<br>distance, in days, between the first case<br>registered<br>in the territory and the time of study) | Multivariate linear regression<br><br>Lag:<br>No lag effect included<br><br>Results:<br><br>Model 1 (average temperature only):<br>Death: $\beta = 0.053^{***}$<br>$^{***}p < 0.01$<br><br>Model 2 (average temperature, maximum<br>temperature, minimum temperature,<br>precipitation, exposure time):<br>Death:<br>Average temperature: $\beta = -0.10$<br>Maximum temperature: $\beta = 0.01$<br>Minimum temperature: $\beta = 0.01$<br>Precipitation: $\beta = 0.34$<br><br>Model 3 (average temperature, maximum<br>temperature, minimum temperature, |

| Author, Year<br>Country | Outcome definition:<br>Outcome measurement:                                                                              | Confounders/ interaction terms in<br>model:                                                                                                                                                                                                                                                                                                                                              | Results<br>Analysis methods:<br>Lag:<br>Summary of results:                                                                                                                                                                                                                                                                                                                                                                                                                                                                                                                                                                                               |
|-------------------------|--------------------------------------------------------------------------------------------------------------------------|------------------------------------------------------------------------------------------------------------------------------------------------------------------------------------------------------------------------------------------------------------------------------------------------------------------------------------------------------------------------------------------|-----------------------------------------------------------------------------------------------------------------------------------------------------------------------------------------------------------------------------------------------------------------------------------------------------------------------------------------------------------------------------------------------------------------------------------------------------------------------------------------------------------------------------------------------------------------------------------------------------------------------------------------------------------|
|                         |                                                                                                                          |                                                                                                                                                                                                                                                                                                                                                                                          | precipitation, exposure time, population density, dummy month):<br>Death:<br>Average temperature: $\beta = -0.10$<br>Maximum temperature: $\beta = 0.02$<br>Minimum temperature: $\beta = 0.001$                                                                                                                                                                                                                                                                                                                                                                                                                                                          |
| Su 2020<br>China        | Cumulative Mortality Rate (CMR)<br><br>John Hopkins University dashboard from Center for Systems Science and Engineering | World Development Indicators dataset (World Bank), urban development (% urban population, population growth, population density), GDP per capita, health, infrastructure (railways, passengers carried), poverty (poverty headcount ratio), science and technology (researchers in R&D), social protection and labor (cover of social insurance programs, unemployment), mean wind speed | Negative binomial regression<br><br>Lag: No consideration of time<br><br>Cumulative mortality rate<br>Mean temperature (°C):<br>IRR= 0.975 (95% CI 0.887-1.071)<br>Relative humidity (%):<br>IRR= 1.025 (95% CI 0.995-1.056)<br>Mean wind speed (.1 knots):<br>IRR= 1.155 (95% CI 0.951-1.403)<br>Precipitation (0.01 inches)<br>IRR= 0.019 (95% CI 0.001-0.377)                                                                                                                                                                                                                                                                                          |
| Wu 2020<br>China        | Daily new deaths<br><br>Cases collected from WHO daily situation reports                                                 | Wind speed, median age of national population, Global Health Security Index, Human Development Index, population Density, controlling for countries, date of the week and date of the observation to control time trend and cycle                                                                                                                                                        | Log-linear Generalized Additive Model (GAM)<br><br>The lag effects of weather conditions on daily new deaths were considered using single lag days (lag 0, 1, 2, 3). The cumulative effects of average exposure over multiple days were then assessed using additional analyses (lag 01, 02, 03) to control for the possible misalignment of a single lag day exposure.<br><br>Changes in daily new deaths (% change) associated with each 1-unit increase:<br><br>Temperature (°C):<br>$\beta = -0.65\%$ (95% CI -1.40% to 0.099%)<br>Relative humidity (%)<br>$\beta = -0.46\%$ (95% CI -0.63% to -0.29%)<br>Controlled for HDI and population density. |

| Author, Year<br>Country  | Outcome definition:<br>Outcome measurement:                                                                                                                                                                                                                                                                                                     | Confounders/ interaction terms in<br>model: | Results<br>Analysis methods:<br>Lag:<br>Summary of results:                                                                                                                                                                                                                                                                                                                                                                                                                                                                                                        |
|--------------------------|-------------------------------------------------------------------------------------------------------------------------------------------------------------------------------------------------------------------------------------------------------------------------------------------------------------------------------------------------|---------------------------------------------|--------------------------------------------------------------------------------------------------------------------------------------------------------------------------------------------------------------------------------------------------------------------------------------------------------------------------------------------------------------------------------------------------------------------------------------------------------------------------------------------------------------------------------------------------------------------|
|                          |                                                                                                                                                                                                                                                                                                                                                 |                                             | <p>Sensitivity analyses:<br/>Over 10 days since the first reported case:<br/>Temperature (°C):<br/><math>\beta = -1.22\%</math> (95% CI -2.00% to -0.45%)<br/>Relative humidity (%):<br/><math>\beta = -0.51\%</math> (95% CI -0.68% to -0.34%)</p> <p>Over 100 cumulative cases:<br/>Temperature (°C):<br/><math>\beta = -1.25\%</math> (95% CI -2.16% to -0.34%)<br/>Relative humidity (%):<br/><math>\beta = -0.53\%</math> (95% CI -0.73% to -0.33%)</p>                                                                                                       |
| Rehman, 2020<br>Pakistan | <p>COVID-19 deaths</p> <p>Collected from the government of Pakistan<br/><a href="http://covid.gov.pk/stats/pakistan">http://covid.gov.pk/stats/pakistan</a><br/>and Worldometer Coronavirus cases<br/><a href="https://www.worldometers.info/coronavirus/country/pakistan/">https://www.worldometers.info/coronavirus/country/pakistan/</a></p> | Sun status                                  | <p>Negative Binomial Log Linear Mixed Model</p> <p>No lag</p> <p>Results: COVID-19 deaths</p> <p>Wind</p> <p>Sindh:<br/>OR= 1.018 (0.976, 1.062)</p> <p>Punjab:<br/>OR= 1.019 (0.985,1.054)</p> <p>KPK:<br/>OR= 1.009 (0.979, 1.040)</p> <p>Balochistan:<br/>OR= 1.020 (0.996, 1.045)</p> <p>Islamabad:<br/>OR= 0.969 (0.932, 1.007)</p> <p>Gilgit Baltistan:<br/>OR= 0.913 (0.741, 1.124)</p> <p>Azad Kashmir:<br/>OR= 0.947 (0.871, 1.029)</p> <p>Humidity</p> <p>Sindh:<br/>OR= 1.001 (0.980, 1.023)</p> <p>Punjab:<br/>OR= 1.005 (0.985,1.029)</p> <p>KPK:</p> |

| Author, Year<br>Country | Outcome definition:<br>Outcome measurement: | Confounders/ interaction terms in<br>model: | Results<br>Analysis methods:<br>Lag:<br>Summary of results:                                                                                                                                                                                                                                                                                                                                                                                                                                                                                                                                                                                                                                                                                                                                                                                                                              |
|-------------------------|---------------------------------------------|---------------------------------------------|------------------------------------------------------------------------------------------------------------------------------------------------------------------------------------------------------------------------------------------------------------------------------------------------------------------------------------------------------------------------------------------------------------------------------------------------------------------------------------------------------------------------------------------------------------------------------------------------------------------------------------------------------------------------------------------------------------------------------------------------------------------------------------------------------------------------------------------------------------------------------------------|
|                         |                                             |                                             | OR= 1.002 (0.982, 1.023)<br>Balochistan:<br>OR= 0.981 (0.961, 1.002)<br>Islamabad:<br>OR= 1.017 (0.994, 1.040)<br>Gilgit Baltisitan:<br>OR= 0.998 (0.970, 1.028)<br>Azad Kashmir:<br>OR= 0.986 (0.955, 1.017)<br><br>Temperature daily maximum<br>Sindh:<br>OR= 1.057 (0.957, 1.168)<br>Punjab:<br>OR= 1.076 (0.982,1.16)<br>KPK:<br>OR= 1.100 (0.997, 1.213)<br>Balochistan:<br>OR= 1.085 (0.998, 1.191)<br>Islamabad:<br>OR= 1.100 (1.001, 1.209)<br>Gilgit Baltisitan:<br>OR= 1.026 (0.900, 1.169)<br>Azad Kashmir:<br>OR= 1.108 (0.953, 1.288)<br><br>Temperature daily minimum<br>Sindh:<br>OR= 1.421 (1.307, 1.544)<br>Punjab:<br>OR= 1.194 (1.11,1.296)<br>KPK:<br>OR= 1.065 (0.973, 1.166)<br>Balochistan:<br>OR= 1.002 (0.921, 1.091)<br>Islamabad:<br>OR= 1.197 (1.087, 1.317)<br>Gilgit Baltisitan:<br>OR= 1.105 (0.981, 1.245)<br>Azad Kashmir:<br>OR= 1.1143 (1.004, 1.301) |



| Author, Year<br>Country | Outcome definition:<br>Outcome measurement:                                                                                                                                                                                                                                                                  | Confounders/ interaction terms in<br>model:                                                                                                               | Results<br>Analysis methods:<br>Lag:<br>Summary of results:                                                                                                                                                                                                                                                                                                                                                                                                                                                                                                                                                                                                                                                                                                                                                                                                                                                                                                                                                                                                                                                                                                                                                                                     |
|-------------------------|--------------------------------------------------------------------------------------------------------------------------------------------------------------------------------------------------------------------------------------------------------------------------------------------------------------|-----------------------------------------------------------------------------------------------------------------------------------------------------------|-------------------------------------------------------------------------------------------------------------------------------------------------------------------------------------------------------------------------------------------------------------------------------------------------------------------------------------------------------------------------------------------------------------------------------------------------------------------------------------------------------------------------------------------------------------------------------------------------------------------------------------------------------------------------------------------------------------------------------------------------------------------------------------------------------------------------------------------------------------------------------------------------------------------------------------------------------------------------------------------------------------------------------------------------------------------------------------------------------------------------------------------------------------------------------------------------------------------------------------------------|
| Guo, 2020<br>China      | COVID-19 mortality<br><br>Data repository from Johns Hopkins University Center for Systems Science and Engineering (JHU VSSE)<br>The Wind Financial databases (WFD) for detailed information on COVID-19 at city/stae level in Australia, Canada, USA, China, Germany, Italy, Japan, Korea, Norway and Spain | Date of first reported cases, population density, median age, Global Health Security Index (GHSI), latitude, longitude, intervention policies implemented | Negative Binomial Log Linear Mixed Model<br><br>Association of COVID-19 mortality with meteorological factors<br><br>Lag 0-14 days<br>Temperature (Reference=11°C)<br>5°C: RR 1.35 (95% CI: 1.21, 1.51)<br>22°C: RR= 0.51 (95%CI: 0.39, 0.67)<br>Relative humidity (Reference= 71%)<br>59%: RR= 0.98 (95% CI: 0.92-1.05)<br>79%: RR= 0.86 (95% CI: 0.80-0.92)<br>Wind speed (Reference= 3 m/s)<br>2 m/s: RR= 1.31 (95% CI: 1.16, 1.48)<br>4 m/s: RR= 0.76 (95% CI: 0.70, 0.82)<br><br>Lag 0-7<br>Temperature (Reference=11°C)<br>5°C: RR 1.31 (95% CI: 1.20, 1.43)<br>22°C: RR= 0.59 (95%CI: 0.47, 0.74)<br>Relative humidity (Reference= 71%)<br>59%: RR= 0.96 (95% CI: 0.91-1.00)<br>79%: RR= 0.91 (95% CI: 0.86-0.96)<br>Wind speed (Reference= 3 m/s)<br>2 m/s: RR= 1.09 (95% CI: 1.00, 1.19)<br>4 m/s: RR= 0.90 (95% CI: 0.85, 0.95)<br><br>Lag 0<br>Temperature (Reference=11°C)<br>5°C: RR 1.03 (95% CI: 1.00, 1.06)<br>22°C: RR= 0.95 (95%CI: 0.88, 1.03)<br>Relative humidity (Reference= 71%)<br>59%: RR= 1.00 (95% CI: 0.98-1.02)<br>79%: RR= 0.97 (95% CI: 0.96-0.99)<br>Wind speed (Reference= 3 m/s)<br>2 m/s: RR= 0.99 (95% CI: 0.97, 1.01)<br>4 m/s: RR= 1.00 (95% CI: 0.99, 1.01)<br><br>Lag 7<br>Temperature (Reference=11°C) |

| Author, Year<br>Country        | Outcome definition:<br>Outcome measurement:                                                                                                | Confounders/ interaction terms in<br>model:                                                                                                                                    | Results<br>Analysis methods:<br>Lag:<br>Summary of results:                                                                                                                                                                                                                                                                                                                                                                                                                                                                                                                                                                                                                                                                                                                                                                                                                   |
|--------------------------------|--------------------------------------------------------------------------------------------------------------------------------------------|--------------------------------------------------------------------------------------------------------------------------------------------------------------------------------|-------------------------------------------------------------------------------------------------------------------------------------------------------------------------------------------------------------------------------------------------------------------------------------------------------------------------------------------------------------------------------------------------------------------------------------------------------------------------------------------------------------------------------------------------------------------------------------------------------------------------------------------------------------------------------------------------------------------------------------------------------------------------------------------------------------------------------------------------------------------------------|
|                                |                                                                                                                                            |                                                                                                                                                                                | <p>5°C: RR 1.02 (95% CI: 1.01, 1.04)<br/> 22°C: RR= 0.95 (95%CI: 0.91, 0.99)<br/> Relative humidity (Reference= 71%)<br/> 59%: RR= 1.00 (95% CI: 0.99-1.00)<br/> 79%: RR= 1.00 (95% CI: 0.99-1.00)<br/> Wind speed (Reference= 3 m/s)<br/> 2 m/s: RR= 1.03 (95% CI: 1.01, 1.04)<br/> 4 m/s: RR= 0.98 (95% CI: 0.97, 0.98)</p> <p>Lag 14<br/> Temperature (Reference=11°C)<br/> 5°C: RR 1.02 (95% CI: 0.99, 1.06)<br/> 22°C: RR= 0.92 (95%CI: 0.84, 1.01)<br/> Relative humidity (Reference= 71%)<br/> 59%: RR= 1.00 (95% CI: 0.98-1.02)<br/> 79%: RR= 1.00 (95% CI: 0.98-1.02)<br/> Wind speed (Reference= 3 m/s)<br/> 2 m/s: RR= 1.03 (95% CI: 1.00, 1.05)<br/> 4 m/s: RR= 0.98 (95% CI: 0.96, 0.99)</p> <p>Shown values of temperature, relative humidity<br/> and wind speed correspond to the 25<sup>th</sup> and 75<sup>th</sup><br/> percentiles of weather values.</p> |
| Islam, 2020<br>Bangladesh      | <p>COVID-19 death cases</p> <p>Data from Bangladeshi government<br/> site: <a href="https://corona.gov.bd/">https://corona.gov.bd/</a></p> | <p>None besides the weather parameters<br/> shown in results (NRH, TDN, MT,<br/> MRH, AH)</p>                                                                                  | <p>Compound Poisson generalized linear model,<br/> along with a Monte-Carlo method and random<br/> forest model</p> <p>Lag: Single and multiple day lags</p> <p>Results: no effect numbers (Figures 5 and 6 in the<br/> text shows a depiction)</p>                                                                                                                                                                                                                                                                                                                                                                                                                                                                                                                                                                                                                           |
| Jiang and Xu,<br>2021<br>China | <p>COVID-19 deaths</p> <p>Maintained by the Health<br/> Commission<br/> of Hubei China</p>                                                 | <p>No further confounders in the analysis<br/> model and no government<br/> interventions were included because<br/> the whole study period was under strict<br/> lockdown</p> | <p>Poisson generalized linear model</p> <p>Lag: 18 days</p> <p>Results<br/> Daily temperature<br/> <math>\beta = -0.149</math><br/> RR = 0.861 (95% CI: 0.851, 0.872)</p>                                                                                                                                                                                                                                                                                                                                                                                                                                                                                                                                                                                                                                                                                                     |

| Author, Year<br>Country                           | Outcome definition:<br>Outcome measurement:                                                                                                                                                           | Confounders/ interaction terms in<br>model:                                                                                                                                                                                                                              | Results<br>Analysis methods:<br>Lag:<br>Summary of results:                                                                                                                                                                                                                                                                                                                                                                                                                                                                                                                                                                                                                                 |
|---------------------------------------------------|-------------------------------------------------------------------------------------------------------------------------------------------------------------------------------------------------------|--------------------------------------------------------------------------------------------------------------------------------------------------------------------------------------------------------------------------------------------------------------------------|---------------------------------------------------------------------------------------------------------------------------------------------------------------------------------------------------------------------------------------------------------------------------------------------------------------------------------------------------------------------------------------------------------------------------------------------------------------------------------------------------------------------------------------------------------------------------------------------------------------------------------------------------------------------------------------------|
|                                                   |                                                                                                                                                                                                       |                                                                                                                                                                                                                                                                          | <p>Relative humidity<br/> <math>\beta = -0.005</math><br/> RR = 0.995 (95% CI: 0.989, 1)</p> <p>Diurnal temperature range<br/> <math>\beta = 0.014</math><br/> RR = 1.014 (95% CI: 1.003, 1.025)</p>                                                                                                                                                                                                                                                                                                                                                                                                                                                                                        |
| Sun<br>2020<br>England                            | <p>Aggregated three-month England-wide COVID-19 mortality rate</p> <p>Spatial patterns of COVID-19 mortality compared to non-COVID-19 mortality<br/> Obtained from Office for National Statistics</p> | <p>First model:<br/> sex, ethnicity (percent Asians, percent blacks),<br/> percent of households in poverty, unemployment rate, population density, hospital density annual mean PM<sub>2.5</sub></p>                                                                    | <p>Variable selection: Lasso technique, Spatial autoregressive model (MESS-SAR), Eigenvector spatial filtering model (RES-ESF)</p> <p>Lag: No consideration of time</p> <p>Results<br/> First model:<br/> OLS Model:<br/> Humidity: <math>\beta = -8.521^{***}</math><br/> Air temperature: <math>\beta = -0.795</math></p> <p>MESS-SAR Model:<br/> Humidity: <math>\beta = -3.715^{**}</math><br/> Air temperature: <math>\beta = 1.512</math></p> <p>RE-ESF Model:<br/> Humidity: <math>\beta = -4.793^{***}</math><br/> Air temperature: <math>\beta = 3.852</math></p> <p>Model with selected variables using Lasso technique used humidity but not temperature (results not shown)</p> |
| Tzampoglou<br>and Dimitrios,<br>2020<br>Worldwide | <p>Total deaths per million due to COVID-19</p> <p>Taken from European Commission (EC), OurWorldInData.org, and COVID-19 Government Response Tracker, Blavatnik School of Government</p>              | <p>Cloud cover (CC), population density (PD), median age (MA), stringency index (SI), delay in first case (FC) and stay at-home order measures (SH).</p> <p>To include countries that did not impose stay-at-home orders, their SH was time difference between first</p> | <p>Linear Model, Variable Selection: Lasso and forward stepwise</p> <p>Lag: No consideration of time</p> <p>Results forward stepwise regression:<br/> A (95% CIs in parenthesis)<br/> Temperature: <math>\beta = -108.9</math> (-307.2, 89.4)</p>                                                                                                                                                                                                                                                                                                                                                                                                                                           |

| Author, Year<br>Country | Outcome definition:<br>Outcome measurement: | Confounders/ interaction terms in<br>model:           | Results<br>Analysis methods:<br>Lag:<br>Summary of results:                                                                                                                                                                                                                                                                                                                                                                                                                                                                                                                                                                                                                                                                                                                                                                                                                                                                                                                                                                                                                                                                                                                                                                                                                                                                                                                                                                                                                                                                                                                                                                                                                                                                                                                                                                                                                |
|-------------------------|---------------------------------------------|-------------------------------------------------------|----------------------------------------------------------------------------------------------------------------------------------------------------------------------------------------------------------------------------------------------------------------------------------------------------------------------------------------------------------------------------------------------------------------------------------------------------------------------------------------------------------------------------------------------------------------------------------------------------------------------------------------------------------------------------------------------------------------------------------------------------------------------------------------------------------------------------------------------------------------------------------------------------------------------------------------------------------------------------------------------------------------------------------------------------------------------------------------------------------------------------------------------------------------------------------------------------------------------------------------------------------------------------------------------------------------------------------------------------------------------------------------------------------------------------------------------------------------------------------------------------------------------------------------------------------------------------------------------------------------------------------------------------------------------------------------------------------------------------------------------------------------------------------------------------------------------------------------------------------------------------|
|                         |                                             | recorded case and end of investigated<br>time period. | <p>Relative humidity: <math>\beta = 82.2</math> (-125.1, 289.5)<br/> Precipitation: <math>\beta = 13.4</math> (-258.8, 285.6)<br/> confounders: CC, PD, MA, SI, FC, SH<br/> B<br/> Temperature: <math>\beta = -88.9</math> (-259.2, 81.5)<br/> Relative humidity: <math>\beta = 79.1</math> (-126.5, 284.8)<br/> Precipitation: <math>\beta = -17.9</math> (-239.6, 203.8)<br/> Confounders: PD, MA, SI, FC, SH<br/> C<br/> Temperature: <math>\beta = -86.7</math> (-286.3, 112.9)<br/> Relative humidity: <math>\beta = 34.8</math> (-168.9, 238.5)<br/> Precipitation: <math>\beta = 11.3</math> (-264.7, 287.3)<br/> Confounders: CC, PD, MA, FC, SH<br/> D<br/> Temperature: <math>\beta = -89.7</math> (-262.3, 82.9)<br/> Relative humidity: <math>\beta = 34.9</math> (-167.6, 237.3)<br/> Precipitation: <math>\beta = 16.3</math> (-205.0, 237.6)<br/> Confounders: PD, MA, FC, SH<br/> F<br/> Temperature: <math>\beta = -60.6</math> (-222.9, 101.7)<br/> Relative humidity: <math>\beta = 62.7</math> (-131.8, 257.2)<br/> Precipitation: <math>\beta = -14.8</math> (-227.1, 197.5)<br/> Confounders: MA, FC, SH<br/> G<br/> Temperature: <math>\beta = -86.8</math> (-253.8, 80.2)<br/> Relative humidity: <math>\beta = 46.1</math> (-86.6, 178.8)<br/> Confounders: PD, MA, FC, SH<br/> H<br/> Temperature: <math>\beta = -103.9</math> (-275.0, 67.2)<br/> Relative humidity: <math>\beta = 34.7</math> (-168.0, 237.5)<br/> Precipitation: <math>\beta = 28.1</math> (-192.7, 248.8)<br/> Confounders: PD, MA, FC,<br/> I<br/> Temperature: <math>\beta = -99.1</math> (-265.1, 66.9)<br/> Relative humidity: <math>\beta = 54.2</math> (-78.0, 186.4)<br/> Confounders: PD, MA, FC<br/> <br/> Temperature: <math>\beta = -90.9</math> (-258.6, 76.8)<br/> Relative humidity: <math>\beta = 40.6</math> (-92.5, 173.7)<br/> Confounders: PD, MA, SH</p> |

| Author, Year<br>Country     | Outcome definition:<br>Outcome measurement:                                                                                                 | Confounders/ interaction terms in<br>model:                                                                                                                                 | Results<br>Analysis methods:<br>Lag:<br>Summary of results:                                                                                                                                                                                                                                                                                                                                                                                                                              |
|-----------------------------|---------------------------------------------------------------------------------------------------------------------------------------------|-----------------------------------------------------------------------------------------------------------------------------------------------------------------------------|------------------------------------------------------------------------------------------------------------------------------------------------------------------------------------------------------------------------------------------------------------------------------------------------------------------------------------------------------------------------------------------------------------------------------------------------------------------------------------------|
|                             |                                                                                                                                             |                                                                                                                                                                             | Results of Lasso analysis were not shown, but authors stated that they agreed with forward stepwise analysis.                                                                                                                                                                                                                                                                                                                                                                            |
| Fernández 2021<br>Worldwide | Daily confirmed deaths and the total amount of confirmed deaths<br><br>Based on population-level information (per country), reported by WHO | National Biodiversity Index (NBI), Population density, days since last case, days since first case reported in country, country income level, government intervention level | Generalized linear mixed models<br><br>Lag: 14 days<br><br>Results of Bayesian spatio-temporal regression analysis:<br>All countries<br>Precipitation: $\beta = 0.000$ (95% CI: -0.002, 0.001)<br>Maximum temperature: $\beta = -0.003$ (95% CI: -0.010, 0.005)<br><br>Excluding top five countries with largest area (Russia, Canada, China, USA and Brazil)<br>Precipitation: $\beta = -0.001$ (95% CI: -0.002, 0.002)<br>Maximum temperature: $\beta = 0.074$ (95% CI: -0.025, 0.205) |
